# Supplementary material
Source: publisher figshare collection journal article supplement (https://acs.figshare.com/ndownloader/files/9537625)
Supplement: Supplementary file 1 [file 9537625]

# SUPRAMOLECULAR SELF-ASSEMBLY OF MONOCARBOXYDECYL-TERMINATED DIMETHYLSILOXANE OLIGOMER

Gerardo Martínez-Rugiero,<sup>\*,†</sup> Arantxa Arbe,<sup>†</sup> Juan Colmenero,<sup>‡,†,¶</sup> and  
Angel Alegría<sup>\*,‡,†</sup>

<sup>†</sup> Centro de Física de Materiales (CSIC, UPV/EHU) and Materials Physics Center  
MPC, Paseo Manuel de Lardizabal 5, E-20018 San Sebastián, Spain

<sup>‡</sup> Departamento de Física de Materiales (UPV/EHU), Apartado 1072, E-20080 San  
Sebastián, Spain

<sup>¶</sup> Donostia International Physics Center (DIPC), Paseo Manuel de Lardizabal 4, E-  
20018 San Sebastián, Spain

E-mail: gerardo.mtz.rugiero@gmail.com; angel.alegria@ehu.eus

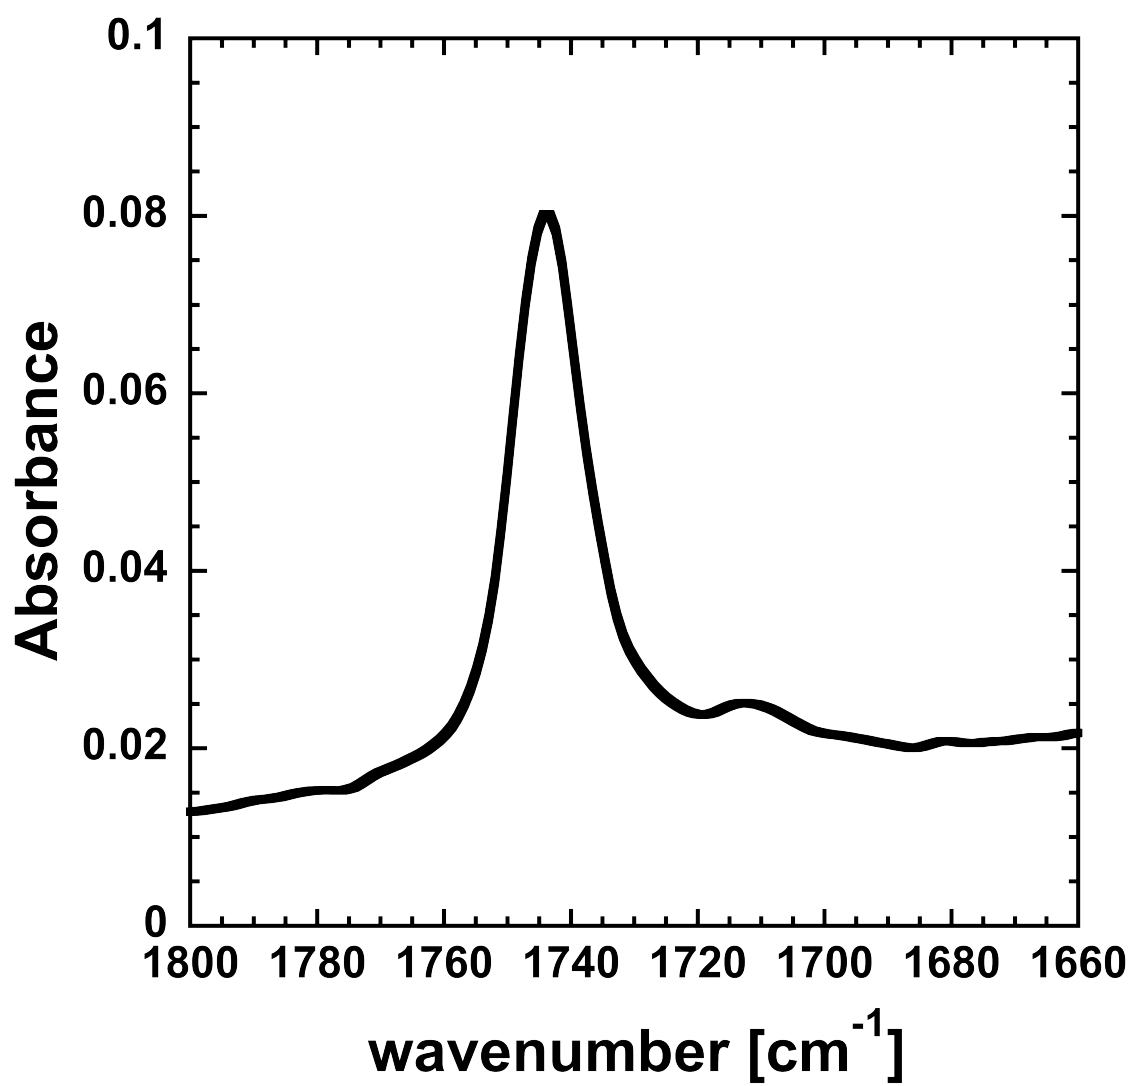

Figure S1. IR absorption of o-DMS-DCOOCH<sub>3</sub> in the range corresponding to the C=O stretching vibration mode.

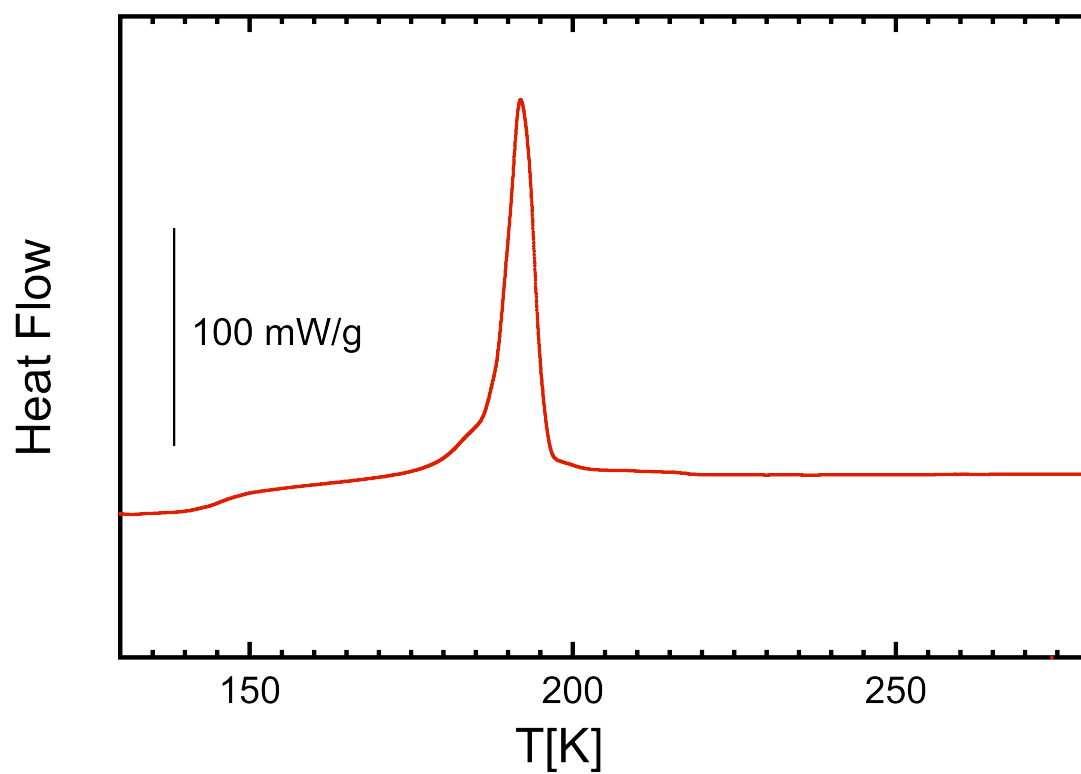

Figure S2. DSC experiment performed on cooling o-DMS-DCOOCH<sub>3</sub> at a rate of 3 K/min.

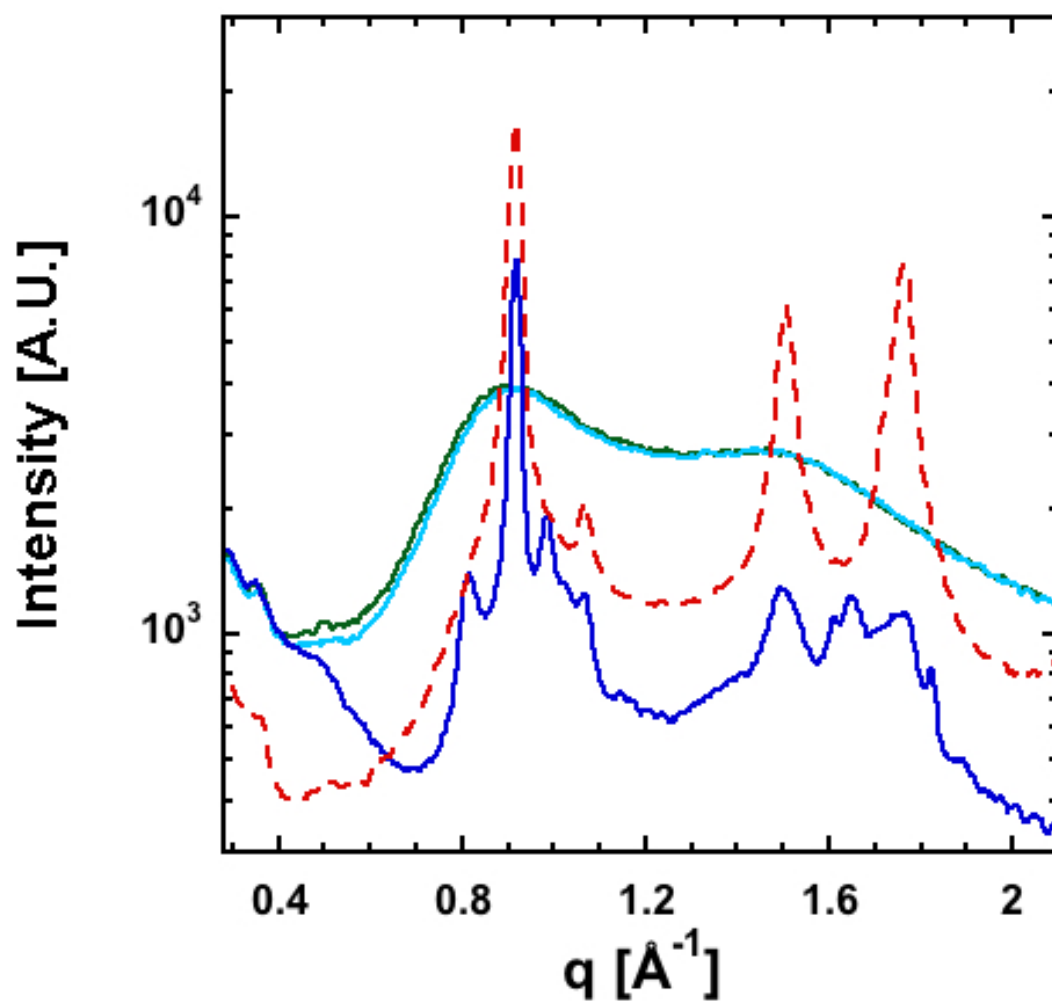

**Figure S3.** WAXS diffraction patterns of o-DMS-DCOOCH<sub>3</sub> (solid lines) compared to those of PDMS (dashed lines) measured at room temperature (upper curves) and at 170 K (lower curves).
